# Supplementary material for: Manipulating the distribution of electric field intensity to effectively enhance the spatial and spectral fluorescence intensity of fluorescent nanodiamonds
Source: Royal Society of Chemistry journal article supplement (doi:10.1039/c8nr01403e), 2018-01-01
Supplement: c8nr01403e1.pdf [file c8nr01403e1.pdf]

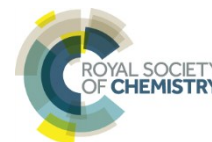

## Manipulating the distribution of electric field intensity to effectively enhance the spatial and spectral fluorescence intensity of fluorescent nanodiamonds

Shan-Jen Kuo<sup>a</sup>, Pei-Chang Tsai<sup>b</sup>, Yang-Chun Lee<sup>a</sup>, Sih-Wei Chang<sup>a</sup>, Shingo Sotoma<sup>b</sup>, Chia-Yi Fang<sup>b</sup>, Huan-Cheng Chang<sup>b,c,d</sup>, and Hsuen-Li Chen<sup>a,e,\*</sup>

- 1) Additional discussions about the enhanced effect of Al/SiO<sub>2</sub> nanocavity system for the fluorescence intensity of FNDs.

Thank you very much for your precious comments.

According to our previous study<sup>1</sup>, the relationship between the optical admittance and the amplitude of surface electric-field ( $E_{surface}$ ) can be obtained through the transfer matrix method.<sup>1</sup> The following equation S1 can express the surface electrical field ( $E_{surface}$ ) on the of nanocavity:

$$E_{surface} = \sqrt{\frac{4}{(\alpha + 1)^2 + \beta^2}} \quad (S1)$$

where  $\alpha$  and  $\beta$  are the real and imaginary parts of the optical admittance of the thin-film assembly. Therefore, the maximum  $E_{surface}$  could be up to 2 when both  $\alpha$  and  $\beta$  approached zero. In our previous

study, through well controlled the thickness of the dielectric SiO<sub>2</sub> film, the maximum  $E_{surface}$  on the surface of two dimensional (2D) materials can be enhanced.<sup>2</sup>

In this study, we used the concept to design an Al/SiO<sub>2</sub> nanocavity and systematic interrogated the  $E_{surface}$  effect of the nanocavity for the FNDs by both thin-film interference and 3D-FDTD methods. The spherical shape of FNDs unlike 2D materials, the  $E_{surface}$  would perform a non-uniform distribution inside the FND. Moreover, due to the surface of the FND generally lacked NV<sup>-</sup> centers, we should control and manipulate the distributions of the electric-field intensities within FNDs by tuning the thickness of the capping SiO<sub>2</sub> layer of the Al/SiO<sub>2</sub> nanocavities to effectively enhance the fluorescence intensity of the FNDs.

#### Note and References:

<sup>a</sup>*Department of Materials Science and Engineering, National Taiwan University, No. 1, Sec. 4, Roosevelt Road, Taipei, 10617 Taiwan*

<sup>b</sup>*Institute of Atomic and Molecular Sciences, Academia Sinica, Taipei 106, Taiwan*

<sup>c</sup>*Department of Chemical Engineering, National Taiwan University of Science and Technology, Taipei 106, Taiwan*

<sup>d</sup>*Department of Chemistry, National Taiwan Normal University, Taipei 106, Taiwan*

<sup>e</sup>*Center of Atomic Initiative for New Materials (AI-MAT), National Taiwan University, Taiwan*

1. Y.-C. Lee, E.-Y. Wang, Y.-L. Liu, H.-L. Chen, *Chem. Mater.* 2015, **27**, 876–884

2. Y.-C. Lee, Y.-C. Tseng, H.-L. Chen, *ACS Photonics*, 2017, **4**, 93–105
